# Supplementary material for: The Catalytic Effect of Pt on Lignin Pyrolysis: A Reactive Molecular Dynamics Study
Source: MDPI journal article supplement (doi:10.3390/su16083419), 2024-04-19
Supplement: s1 [file s1]

**Table S1.** Activation energy at different conversion rates.

| $\alpha$ | Without catalysts |                |           |                |           |                | With catalysts |                |           |                |           |                |
|----------|-------------------|----------------|-----------|----------------|-----------|----------------|----------------|----------------|-----------|----------------|-----------|----------------|
|          | FOW               |                | Kissinger |                | Friedman  |                | FOW            |                | Kissinger |                | Friedman  |                |
|          | E(kJ/mol)         | R <sup>2</sup> | E(kJ/mol) | R <sup>2</sup> | E(kJ/mol) | R <sup>2</sup> | E(kJ/mol)      | R <sup>2</sup> | E(kJ/mol) | R <sup>2</sup> | E(kJ/mol) | R <sup>2</sup> |
| 0.3      | 139.410           | 0.9882         | 116.898   | 0.9822         | 171.215   | 0.9370         | 89.466         | 0.9787         | 77.337    | 0.9694         | 104.598   | 0.99694        |
| 0.4      | 151.391           | 0.9772         | 128.776   | 0.9662         | 154.796   | 0.8501         | 99.947         | 0.9869         | 87.801    | 0.9818         | 89.064    | 0.99994        |
| 0.5      | 154.722           | 0.9577         | 131.655   | 0.9375         | 145.605   | 0.8698         | 100.671        | 0.9936         | 88.049    | 0.9911         | 79.803    | 0.99809        |
| 0.6      | 156.345           | 0.9460         | 132.757   | 0.9202         | 127.829   | 0.7409         | 98.532         | 0.9956         | 85.323    | 0.9939         | 77.441    | 0.98586        |
| 0.7      | 153.175           | 0.9229         | 128.785   | 0.8850         | 128.598   | 0.8398         | 96.434         | 0.9946         | 82.625    | 0.9923         | 106.754   | 0.96933        |
| 0.8      | 152.615           | 0.9162         | 127.504   | 0.8738         | 121.623   | 0.9864         | 104.054        | 0.9879         | 90.0489   | 0.9828         | 119.951   | 0.9383         |
| Average  | 151.276           |                | 127.729   |                | 141.611   |                | 98.1839        |                | 85.197    |                | 96.269    |                |

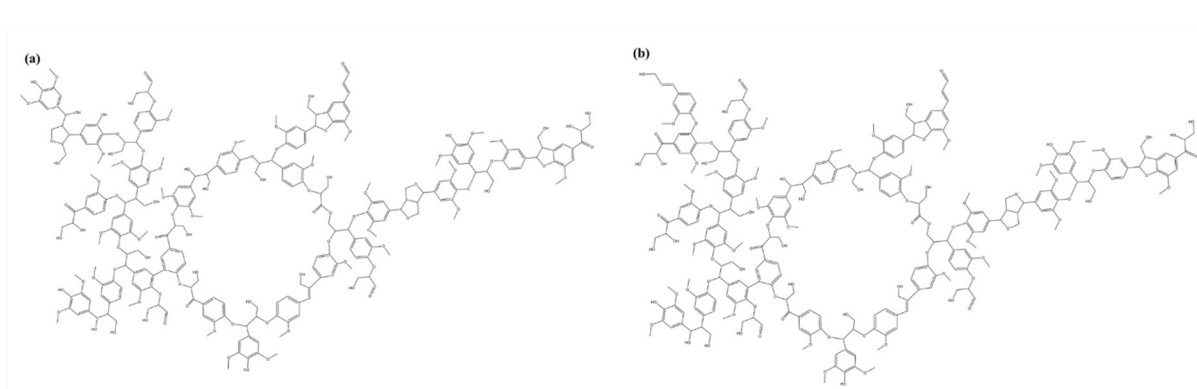

**Figure S1.** The detailed 2D model structures of Nimz's lignin model. The constructed 3D model consists of 5 molecules of (a) and 2 molecules of (b).

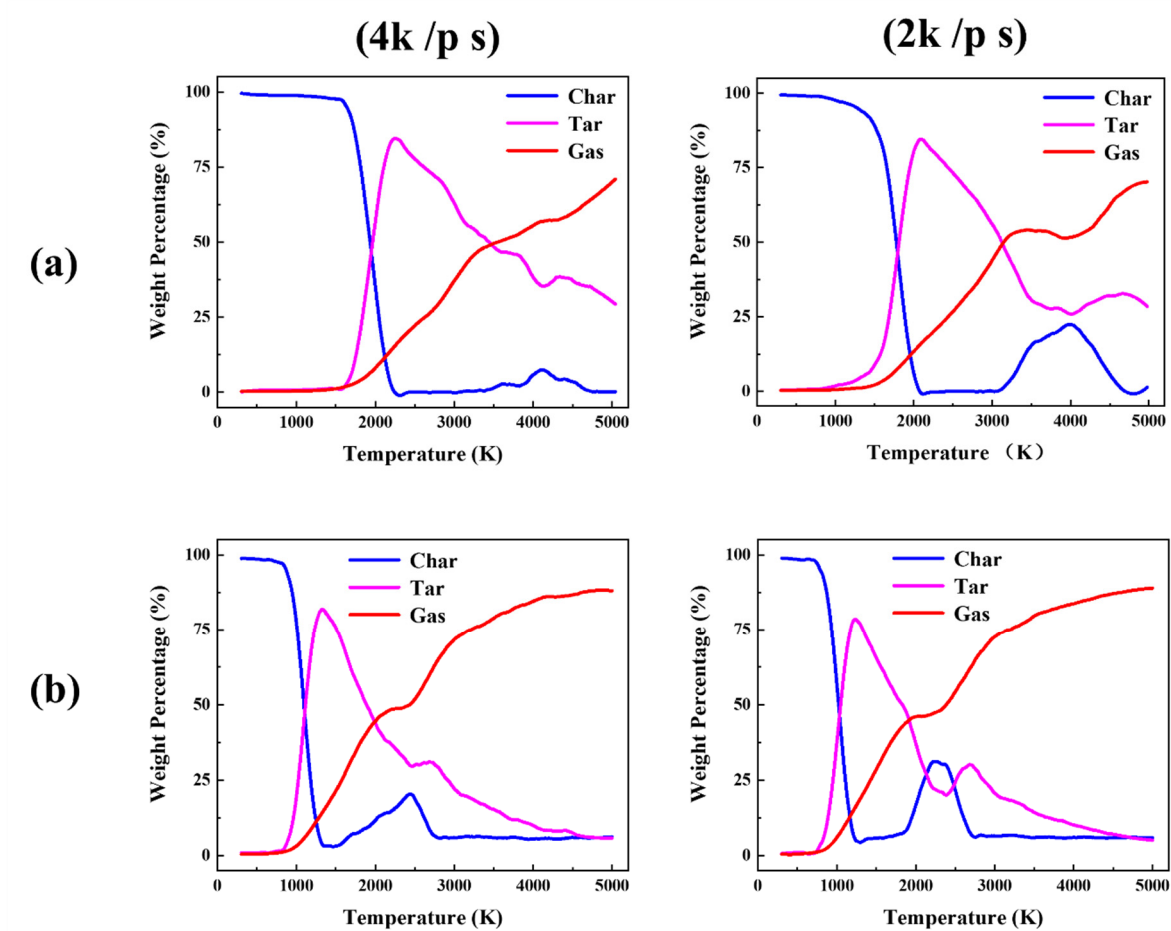

**Figure S2.** Char, Tar and Gas content changes at 4K/ps,2K/ps: (a) without catalysts, (b) with Pt catalysts.

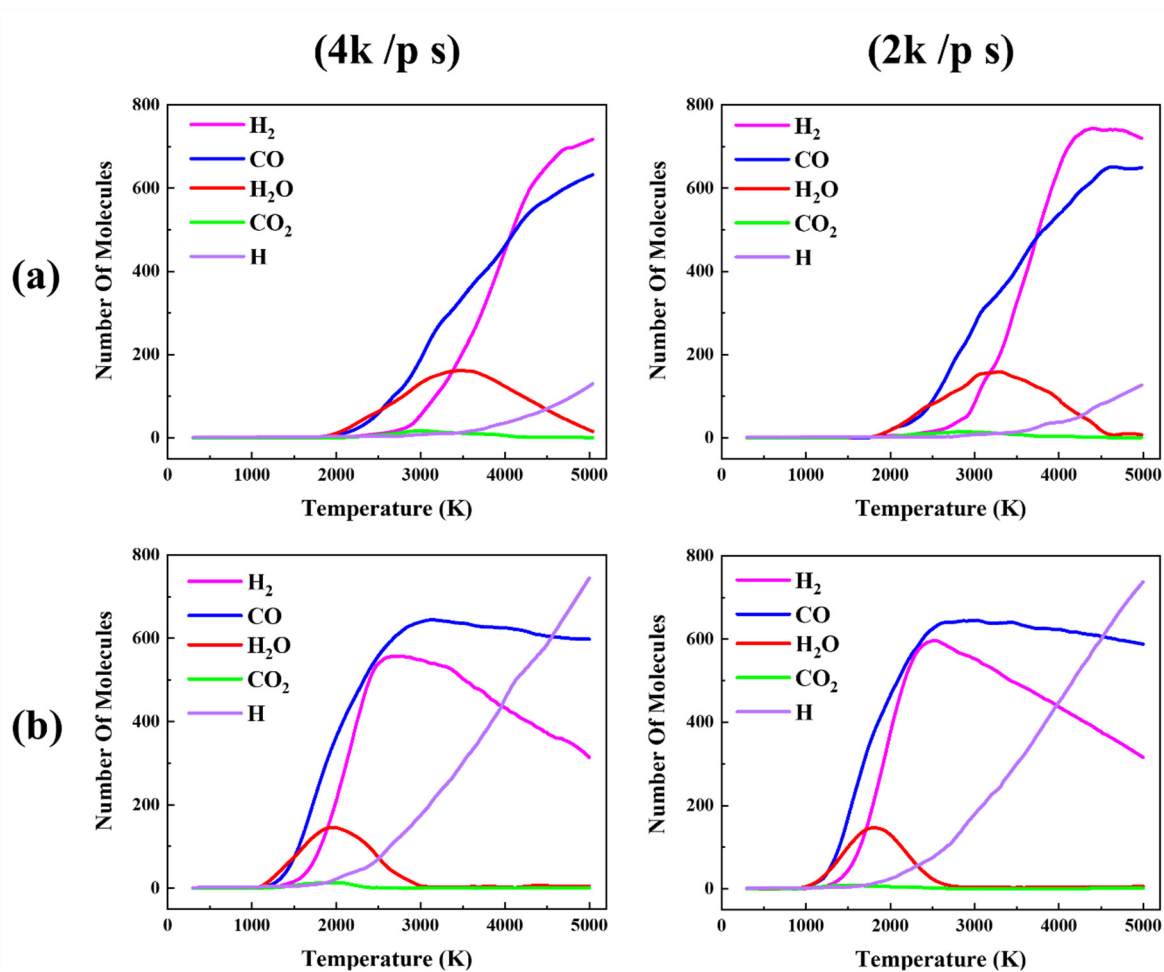

**Figure S3.** The number of molecules at 4K/ps, 2K/ps: (a) without catalysts, (b) with Pt catalysts.

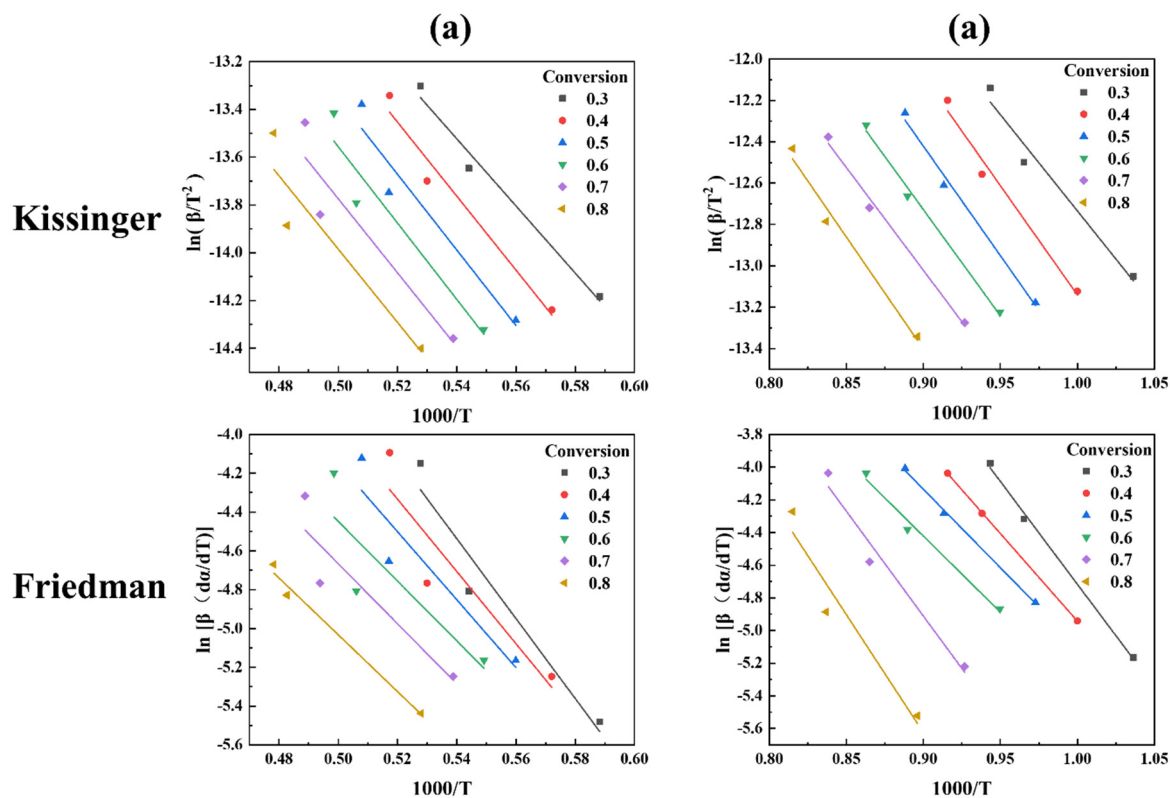

**Figure S4.** The Kissinger and Friedman methods fit activation energies at 4K/ps and 2K/ps: (a) without catalysts, (b) with Pt catalysts.
