# Supplementary material for: The Catalytic Effect of Pt on Lignin Pyrolysis: A Reactive Molecular Dynamics Study
Source: MDPI journal article supplement (doi:10.3390/su16083419), 2024-04-19
Supplement: s1 [file s1]

Archive with 1 entries (1 files):
- sustainability-2915565-supplementary.pdf
